# Supplementary material
Source: Springer Nature journal article supplement (https://www.springermedizin.de/resource/supplementary/12936_2011_1889_MOESM6_ESM.pdf/9542006)

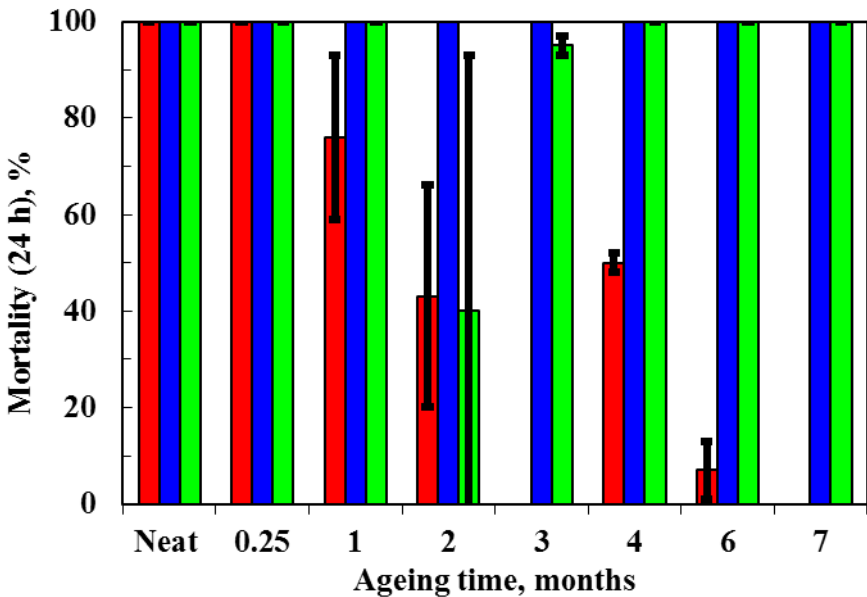

■ DDT on manure

■ Alphacypermethrin+gypsum on manure

■ Bendiocarb+gypsum on manure

Supplement: MOESM6 [file 9542006]
